# Supplementary material for: Hollow mesoporous hydroxyapatite nanoparticles (hmHANPs) with enhanced drug loading and pH-responsive release properties for intracellular drug delivery
Source: Royal Society of Chemistry journal article supplement (doi:10.1039/c3tb20365d), 2013-01-01
Supplement: c3tb20365d.pdf [file c3tb20365d.pdf]

## **Supporting Information**

### **Hollow Mesoporous Hydroxyapatite Nanoparticles (hmHANPs) with Enhanced Drug Loading and pH- Responsive Release Property for Intracellular Drug Delivery**

Ya-Huei Yang,<sup>a</sup> Chia-Hung Liu,<sup>b</sup> Yung-He Liang,<sup>a</sup> Feng-Huei Lin<sup>c,d</sup> and  
Kevin C.-W. Wu<sup>\*a,c</sup>

<sup>a</sup> *Department of Chemical Engineering, National Taiwan University, No. 1, Sec.  
4, Roosevelt Road, Taipei 10617, Taiwan*

<sup>b</sup> *Department of Urology, Taipei Medical University-Shuang Ho Hospital, No.  
291, Jhongjheng Rd., Jhonghe Dist., New Taipei City 23561, Taiwan.*

<sup>c</sup> *Division of Medical Engineering Research, National Health Research  
Institutes, 35 Keyan Road, Zhunan, Miaoli County 350, Taiwan*

<sup>d</sup> *Institute of Biomedical Engineering, National Taiwan University  
No. 1, Sec. 1, Jen-Ai Road, Jhongjheng District, Taipei City 100, Taiwan*

**\*Corresponding Author's E-mail:** kevinwu@ntu.edu.tw

## Experimental

### Chemicals

Calcium acetate monohydrate, sodium bicarbonate, ethylene glycol, and acetic acid were obtained from J.T. Baker. MEM-Eagle, fetal bovine serum, sodium bicarbonate solution (7.5 %), L-Glutamine, penicillin, and 10X PBS were purchased from Level (Taiwan). Phosphoric acid, doxorubicin hydrochloride (DOX), hydrochloric acid (37 %), 4',6-diamidino-2-phenylindole (DAPI), 3-(4,5-dimethylthiazol-2-yl)-2,5-diphenyltetrazolium bromide (MTT), dimethyl sulfoxide (DMSO, 99.5 %), calcium D-gluconate ( $[\text{HOCH}_2[\text{CH}(\text{OH})_4\text{CO}_2]_2\text{Ca}]$ ), potassium hydrogen phosphate ( $\text{K}_2\text{HPO}_4$ ), sodium hydroxide (NaOH), ethanol ( $\text{C}_2\text{H}_5\text{OH}$ , 95 %), and Pluronic F127 (poly(ethylene glycol)<sub>106</sub>-poly(propylene glycol)<sub>70</sub>-poly(ethylene glycol)<sub>106</sub>) were all purchased from Sigma-Aldrich.

### Synthesis of Hydroxyapatite Nanoparticles (HANP) and Hollow Mesoporous Hydroxyapatite Nanoparticles (hmHANP)

The HANPs without a hollow core and mesoporous shell structure were synthesized by modifying the method presented in a previous report (*Sci. Technol. Adv. Mater.*, 2011, **12**, 045005-045010.). Typically, F127 (3 g) and calcium D-gluconate (0.04 mol) were dissolved in distilled water (100 mL), and the mixture was stirred vigorously, until a clear sol solution was obtained. Potassium hydrogen phosphate ( $\text{K}_2\text{HPO}_4$ , 0.024 mol) dissolved in 60 mL distilled water was prepared, and its pH was adjusted to 12.0 using NaOH (2N). The  $\text{PO}_4^{3-}$  solution was then slowly added to the  $\text{Ca}^{2+}$ /F127 solution when stirring. A white precipitate formed after the entire mixture was heated at 90 °C for 24 h. The precipitate was then washed several times with boiling water and ethanol to remove excess calcium D-gluconate. The final product was then collected by filtration and dried at 100 °C for 24 h. The characterization of the synthesized HANP is shown in **Fig. S4 and S5**.

The HANPs with a hollow core and mesoporous shell structure were synthesized by modifying the method presented in a previous report (*J. Mater. Chem.*, 2008, **18**, 2722–2727), and the details were reported in our previous report (*Curr. Nanosci.*, 2011, **7**, 926-931). Hollow nanoparticles have been widely synthesized through selective etching of cores from the corresponding core/shell composites (so-called colloidal templating methods). Although the synthesis of hmHANPs was based on one such colloidal templating method, the reaction conditions for a successful hmHANP formation were systematically optimized (**Fig. S6-S10**). First, two 10 mL of ethylene glycol were separately added into a calcium acetic aqueous solution (0.3 M, 2 mL)

and a sodium bicarbonate aqueous solution (0.3 M, 2 mL). These two solutions were then mixed together. After reacting for 3 h, the mixed solution gradually became turbid, indicating the generation of calcium carbonate ( $\text{CaCO}_3$ ) nanoparticles. A phosphoric acid solution ( $\text{H}_3\text{PO}_4$ , 0.01 M, 1 mL) was added to this solution, and the added phosphate ions replaced a number of carbonate ions to form a hydroxyapatite (HA) shell surrounding the  $\text{CaCO}_3$  nanoparticles (referred as  $\text{CaCO}_3/\text{HA}$  core/shell composite). After reacting for 12 h, the core/shell composite was collected through centrifuge. To remove un-reacted reactants, the composite was washed with deionized water three times. Finally, the composite was immersed in an acetic acid solution (35 mM, 6.5 mL) to remove the  $\text{CaCO}_3$  cores, resulting in hollow hydroxyapatite nanoparticles with a mesoporous shell structure. The final hmHANP product was first washed with deionized water for two to three times to remove residual acetic acid, and then dried in a vacuum.

### Characterization

The crystalline phases of  $\text{CaCO}_3$  and hmHANP were analyzed with an X-ray diffractometer (Rigaku Ultima IV), with  $\text{Cu K}_{\alpha 1}$  radiation (1.5406 Å) at 40 kV and 40 mA. The porous properties of the HANPs and hmHANPs were analyzed using nitrogen adsorption/desorption isotherms on a Micromeritics ASAP 2000 instrument. The pore size distribution curve was obtained from the desorption isotherm using the Barrett-Joyner-Halenda (BJH) method. The specific surface area was calculated using the Brumauer-Emmett-Teller (BET) method. The morphologies, particle sizes, and porous structures of the  $\text{CaCO}_3$  nanoparticles,  $\text{CaCO}_3/\text{hydroxyapatite}$  core/shell composites, and hmHANPs were observed with FE-SEM (FEI Nova NanoSEM 230) and TEM (JEOL JEM 2100F). The phosphorus concentration in the solutions was determined using the molybdenum blue method.

### Preparation of DOX-loaded hmHANP

The anticancer drug, doxorubicin (DOX), was first dissolved in an aqueous solution at the desired concentration ( $10^{-3}$ ,  $10^{-4}$ , and  $10^{-5}$  M). To this  $\text{DOX}_{(\text{aq})}$  solution, hmHANP (10 mg) was added under constant stirring for 24 hr at room temperature in a dark environment. The purple DOX-loaded hmHANPs ( $\text{DOX@hmHANP}$ ) were then collected by centrifugation. To reduce the physical adsorption of DOX on the surface of  $\text{DOX@hmHANPs}$ , the purple precipitate was washed with deionized water, and dried in a vacuum. The fluorescent property of DOX ( $\lambda_{\text{ex}} = 470$  nm and  $\lambda_{\text{em}} = 565$  nm) effectuated calculating the loaded capacity and release percentage of DOX by photoluminescence microscope (PL).

### **Cell culture**

BT-20 human breast cancer cells (ATCC® Number: HTB-19™) were used in this study. They were cultured in flasks with the MEM medium supplemented with 10 % fetal bovine serum, 2 % sodium bicarbonate, 1 % L-Glutamine, and 1 % penicillin at 37 °C under a humidified atmosphere containing 5 % CO<sub>2</sub>.

### **Cell viability**

Cell viability was investigated using MTT assay. First, BT-20 cells were cultured in a 24-well culture plate at a density of  $1 \times 10^5$  cells per well, and allowed to attach overnight. The cell-attached plate was then washed with PBS solution three times, and immersed in serum-free MEM medium (0.5 mL/well) containing different concentrations of nanoparticles or drug-loaded nanoparticles. After incubation for different periods, the nanoparticle-immersed plate was washed several times with PBS solution to remove the nanoparticle residue. The MTT stock solution (5 mg/mL) was then diluted 10 times with serum-free MEM medium and added to each well (0.5 mL/well). These cells were further incubated for 4 h to allow the yellow dye to transform into blue formazan crystals. The un-reacted dye was then removed by aspiration, and DMSO (400 µL) was added to each well to dissolve the blue formazan crystals. Finally, the dissolved DMSO solution was transferred to a 96-well culture plate (100 µL/well), and its optical density was measured with an Elisa Reader at a wavelength of 570 nm.

### **Confocal Microscopy**

BT-20 cells were seeded at a density of  $1 \times 10^5$  cells per well in a 4-well culture plate with Lab-Tek chambered coverglasses at the bottom of each well. After incubation overnight, the BT-20 cells attached to the plate, and the MEM medium was replaced with different concentrations of drug-loaded nanoparticles in serum-free MEM medium (0.5 mL/well). The cell-plated coverglasses were then washed with PBS solution three times. A DAPI PBS buffer ( $2.80 \times 10^{-5}$  M, 1 mL) was then added to stain the cell nuclei for 30-60 minutes. After being washed with PBS solution, DAPI-stained coverglasses were examined to check the cellular localization of particles using a confocal fluorescence microscopy system (Leica TCS SP5 II) with a 63x oil immersion objective lens.

### **Measurement of phosphorus concentration by the molybdenum blue method**

10 mg of hmHANP was mixed with acetate buffer solutions (10 mM, 4

mL, pH 4.5 or 7.4). After stirring for 1 hr at 37 °C, the solution was centrifuged. 0.8 mL of the supernatant was taken out and diluted to 50 mL before 8 mL of the molybdenum solution was added. After reaction for 10 mins, the absorption at 880 nm was read to determine the concentration of the phosphorus. The calibration curve was done using  $\text{KH}_2\text{PO}_4$  as a reference.

#### **Calculation for loading and release of drug**

- Loading capacity (mol/g) = mole of drug loaded divided by gram of nanovehicles (HANP or hmHANP).

(The loading capacity (mg/g) =  $543.52 \times 10^3 \times$  loading capacity (mol/g)).

- Loading efficacy (%) = loading capacity divided by maximum loading capacity  $\times 100$ .

(The maximum loading capacity was determined by adding the same amount of hmHANPs into a series of DOX solutions with different concentrations.)

- Release amount (mole/g) = mole of drug released from nanovehicles divided by gram of drug loaded nanovehicles.
- Release percentage (%) = release amount divided by loading capacity  $\times 100$ .

## Results & Discussion

### Characterization of the synthesized hmHANP

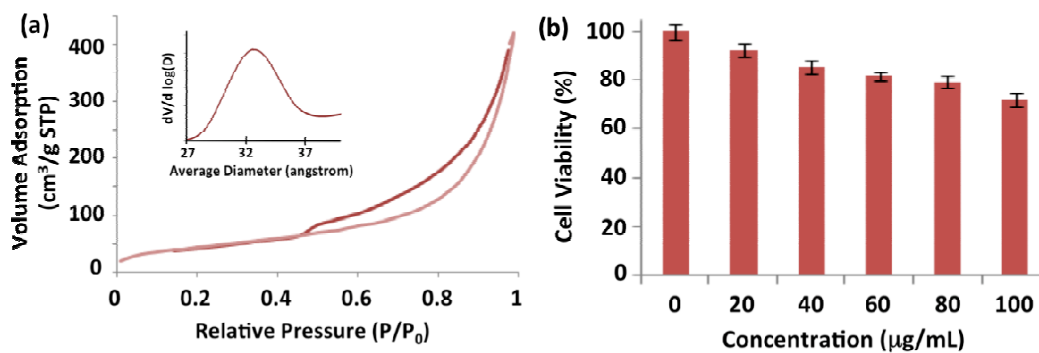

**Figure S1.** (a) Nitrogen adsorption/desorption isotherm and pore size distribution (inset) for hmHANP. (b) MTT assays of BT-20 cells treated with various concentrations of hmHANP.

**The difference between release percentages of DOX from DOX@hmHANPs released at two different pH values**

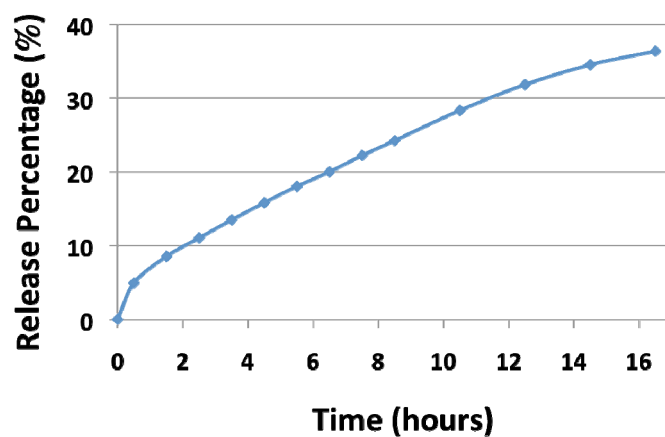

**Figure S2.** A linear relation between time and release percentage that was obtained from subtraction of release amount at pH 7.4 from that at pH 4.5.

**MTT assays of BT-20 cells treated with DOX@hmHANPs (100  $\mu\text{g}/\text{mL}$ ) for different time**

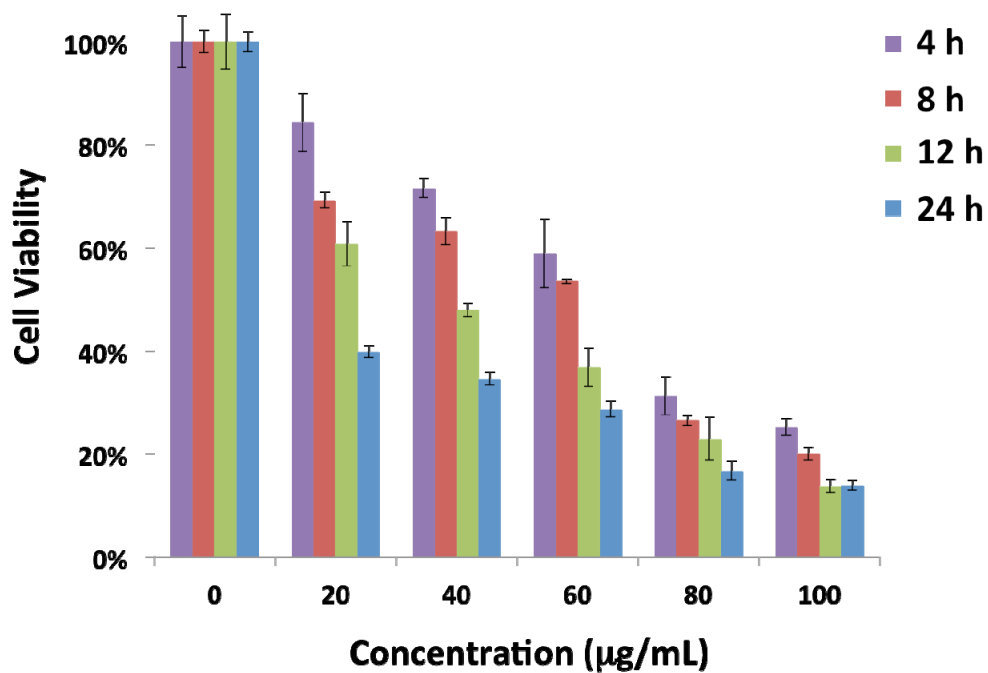

**Figure S3.** MTT assays of BT-20 cells treated with DOX@hmHANPs (100  $\mu\text{g}/\text{mL}$ ) for different time.



## Characterization of synthesized HANP

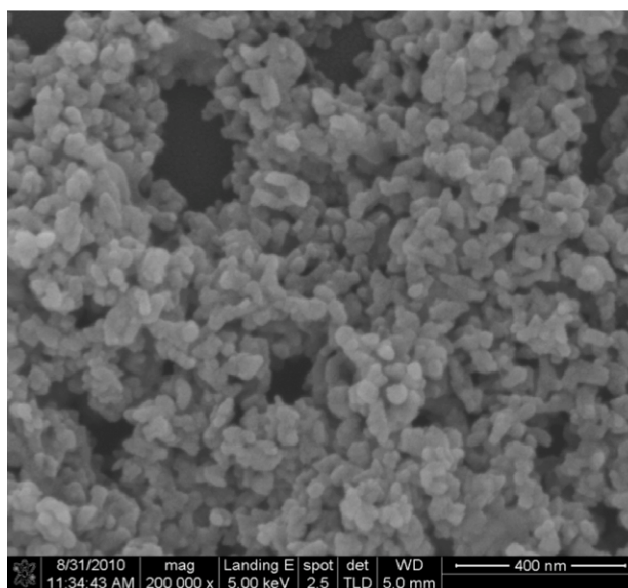

**Figure S4.** A typical SEM image of HANPs synthesized in this study.

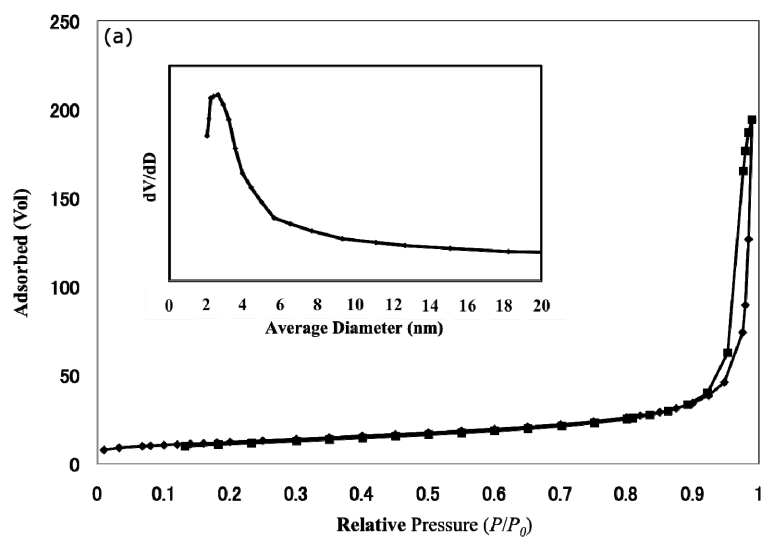

**Figure S5.** A nitrogen adsorption/desorption isotherm and pore size distribution (inset) of HANPs synthesized in this study.

## Optimization of synthetic conditions for hmHANP

1. Effect of the amount of ethylene glycol (EG). The optimal ratio is 1:5.

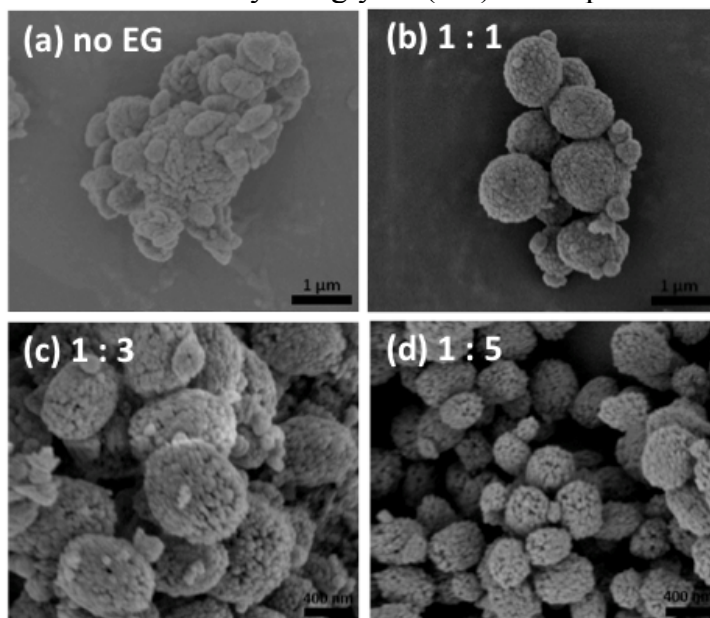

**Figure S6.** SEM images of  $\text{CaCO}_3$  nanoparticles synthesized at different ratios of  $\text{CaCO}_3$  precursor solution to EG.

2. Effect of the concentrations of  $\text{Ca}(\text{CH}_3\text{COO})_{2(\text{aq})}$  and  $\text{NaHCO}_{3(\text{aq})}$ . The optimal ratio is 0.3 M: 0.3 M.

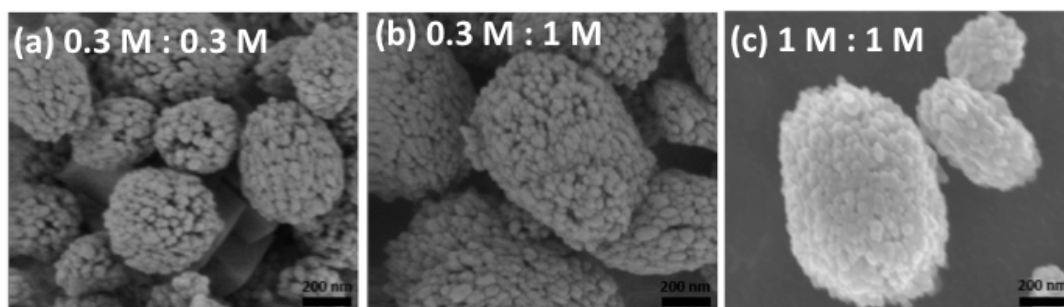

**Figure S7.** SEM images of  $\text{CaCO}_3$  nanoparticles synthesized at different ratios of  $\text{Ca}(\text{CH}_3\text{COO})_{2(\text{aq})}$  to  $\text{NaHCO}_{3(\text{aq})}$ .

3. Effect of reaction time for formation of  $\text{CaCO}_3$  nanoparticles. The optimal time is 3 h.

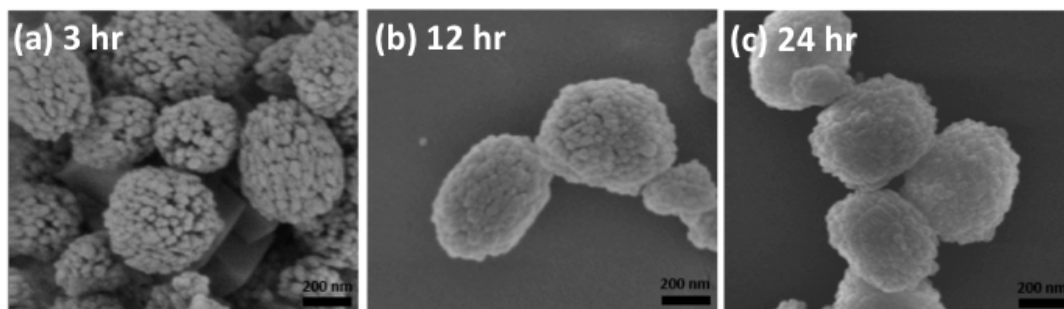

**Figure S8.** SEM images of  $\text{CaCO}_3$  nanoparticles synthesized at different reaction time.

4. Effect of concentrations of  $\text{H}_3\text{PO}_{4(\text{aq})}$  for formation of  $\text{CaCO}_3$ /hydroxyapatite core/shell structure. The optimal concentration of  $\text{H}_3\text{PO}_{4(\text{aq})}$  is 0.01 M.

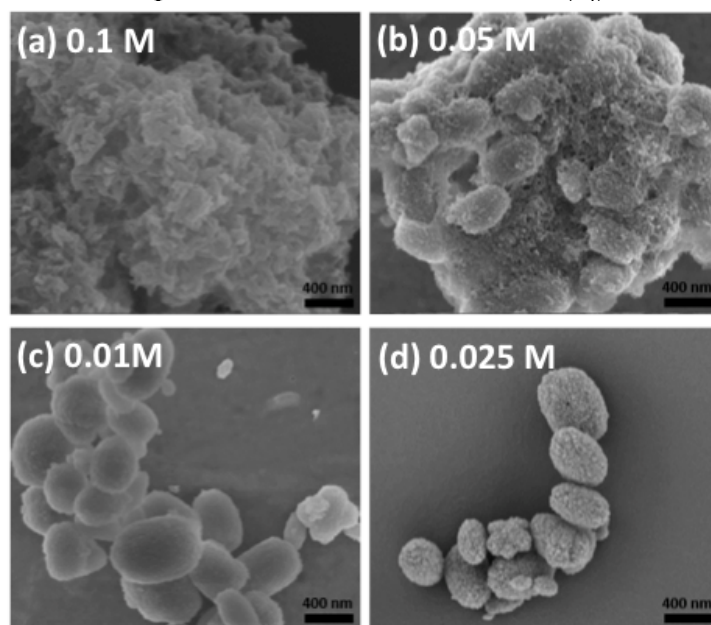

**Figure S9.** SEM images of  $\text{CaCO}_3$ /hydroxyapatite core/shell structure synthesized at different concentrations of  $\text{H}_3\text{PO}_{4(\text{aq})}$

5. Effect of the amount of  $\text{CH}_3\text{COOH}_{(\text{aq})}$ . The optimal ratio of  $\text{CaCO}_3$  precursor solution to  $\text{CH}_3\text{COOH}_{(\text{aq})}$  is 1:3.125.

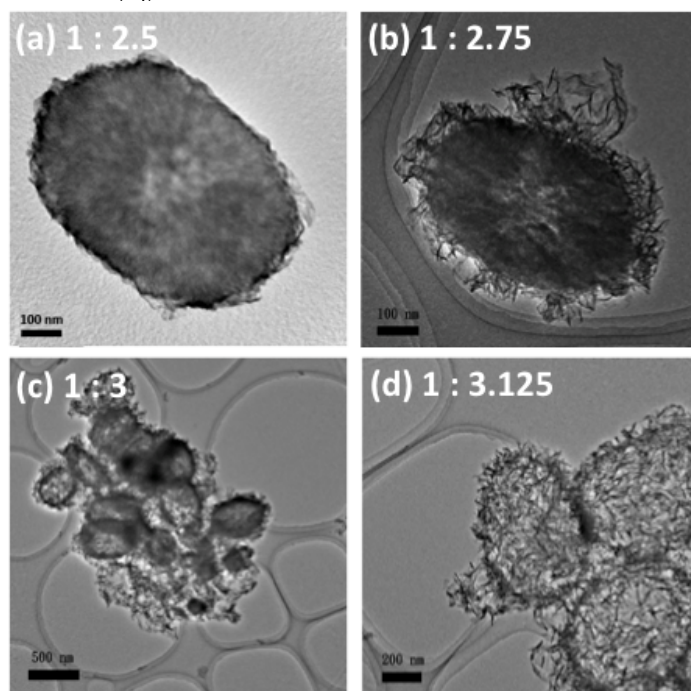

**Figure S10.** TEM images of  $\text{CaCO}_3$ /hydroxyapatite core/shell structures after washing by  $\text{CH}_3\text{COOH}_{(\text{aq})}$  with different ratios of  $\text{CaCO}_3$  precursor solution to  $\text{CH}_3\text{COOH}_{(\text{aq})}$ .
